# Supplementary material for: Measurement of unnecessary psychiatric readmissions: a scoping review protocol
Source: PubMed Central journal article supplement — BMJ Open. 2019 Jul 23;9(7):e030696. doi: 10.1136/bmjopen-2019-030696 (PMC6661670; doi:10.1136/bmjopen-2019-030696), 2019-07-23
Supplement: bmjopen-2019-030696.draft_revisions.pdf [file bmjopen-2019-030696.draft_revisions.pdf]

# BMJ Open

BMJ Open is committed to open peer review. As part of this commitment we make the peer review history of every article we publish publicly available.

When an article is published we post the peer reviewers' comments and the authors' responses online. We also post the versions of the paper that were used during peer review. These are the versions that the peer review comments apply to.

The versions of the paper that follow are the versions that were submitted during the peer review process. They are not the versions of record or the final published versions. They should not be cited or distributed as the published version of this manuscript.

BMJ Open is an open access journal and the full, final, typeset and author-corrected version of record of the manuscript is available on our site with no access controls, subscription charges or pay-per-view fees (<http://bmjopen.bmj.com>).

If you have any questions on BMJ Open's open peer review process please email [info.bmjopen@bmj.com](mailto:info.bmjopen@bmj.com)

# BMJ Open

## Measurement of unnecessary psychiatric readmissions: a scoping review protocol

|                               |                                                                                                                                                                                                                                                                      |
|-------------------------------|----------------------------------------------------------------------------------------------------------------------------------------------------------------------------------------------------------------------------------------------------------------------|
| Journal:                      | <i>BMJ Open</i>                                                                                                                                                                                                                                                      |
| Manuscript ID                 | bmjopen-2019-030696                                                                                                                                                                                                                                                  |
| Article Type:                 | Protocol                                                                                                                                                                                                                                                             |
| Date Submitted by the Author: | 27-Mar-2019                                                                                                                                                                                                                                                          |
| Complete List of Authors:     | Kim, Bo; U.S. Veterans Health Administration; Harvard Medical School Department of Psychiatry<br>Weatherly, Christopher; Washington University in Saint Louis<br>Wolk, Courtney; University of Pennsylvania,<br>Proctor, Enola; Washington University in Saint Louis |
| Keywords:                     | hospital readmission, administrative data, care transition, patient discharge, MENTAL HEALTH                                                                                                                                                                         |
|                               |                                                                                                                                                                                                                                                                      |

SCHOLARONE™  
Manuscripts

1  
2  
3 **Measurement of unnecessary psychiatric readmissions: a scoping review protocol**  
4  
5  
6

7 Bo Kim<sup>1,2\*</sup>  
8

9 Christopher Weatherly<sup>3</sup>  
10

11 Courtney Benjamin Wolk<sup>4</sup>  
12

13 Enola K. Proctor<sup>3</sup>  
14  
15

16  
17  
18  
19 <sup>1</sup>Health Services Research & Development Center for Healthcare Organization and Implementation  
20 Research, U.S. Department of Veterans Affairs, Boston, MA, U.S.A.  
21

22 <sup>2</sup>Department of Psychiatry, Harvard Medical School, Boston, MA, U.S.A.  
23

24 <sup>3</sup>George Warren Brown School of Social Work, Washington University, St. Louis, MO, U.S.A.  
25

26 <sup>4</sup>Center for Mental Health, Department of Psychiatry, Perelman School of Medicine, University of  
27 Pennsylvania, Philadelphia, PA, U.S.A.  
28

29  
30  
31 \*Corresponding author

32 Postal address: 150 South Huntington Avenue, Boston, MA 02130 U.S.A.

33 E-mail: bo.kim@va.gov

34 Telephone number: 1-857-364-4867  
35  
36  
37  
38  
39

40 Word count: 3,188  
41  
42  
43  
44  
45

46 Keywords: hospital readmission, administrative data, care transition, patient discharge, mental health  
47  
48  
49  
50  
51  
52  
53  
54  
55  
56  
57  
58

## ABSTRACT

**Introduction:** Care transition for patients being discharged from inpatient mental health care to outpatient settings is a growing focus for health care delivery systems. Many studies of this inpatient-to-outpatient transition use the rate of post-discharge readmissions as a patient-level outcome measure to assess the quality of transition. However, it is unclear how studies define the measure, and whether there is a shared understanding by the field regarding which definition is appropriate for which circumstances. This scoping review thus aims to examine how published studies have approached measuring psychiatric readmissions.

**Methods and analysis:** The scoping review will be structured according to Levac et al.'s enhancement to Arksey and O'Malley's framework for conducting scoping studies. The protocol is registered through the Open Science Framework (<https://osf.io/5nxuc/>). We will search literature databases for studies that (i) are about interventions associated with psychiatric readmissions and (ii) specify use of at least one readmission time interval (i.e., time period since previous discharge from inpatient care, within which a hospitalization can be considered a readmission). Screening and review of articles will be carried out by two reviewers, first independently then involving a third reviewer as needed for consensus. We will assess review findings through both tabular and thematic analyses, noting prevalent trends in study characteristics and emergent themes across our reviewed studies.

**Ethics and dissemination:** This work comes at a time of heightened interest by many mental health care systems in high quality practices that structure their care processes toward effective inpatient-to-outpatient transitions. Findings will support the systems' careful examination of alternative potential transitional interventions, helping to ensure that their often limited quality enhancement resources are put to optimal use. We will focus on disseminating our findings to the health care community through strong communication infrastructures and connections with health system stakeholders that our multidisciplinary study consultants will foster throughout this study.

## ARTICLE SUMMARY

### Strengths and limitations of this study

- This review plans a comprehensive search of how unnecessary psychiatric readmissions are measured, closely following Levac and colleagues' established methodological framework for conducting scoping studies.
- This review does not aim to assess the effectiveness of approaches used by the included studies in measuring unnecessary psychiatric readmissions. This aligns with the purpose of conducting scoping reviews, which are to identify current gaps in knowledge and to establish a new research agenda.
- Other ways of measuring unnecessary psychiatric readmissions may exist that have not been published as peer-reviewed journal articles that are indexed by the databases included in our review.
- This scoping review will form an essential knowledge base upon which to build future designs, implementations, and evaluations of interventions that enable safe and appropriate care transitions from inpatient to outpatient mental health care settings.

## INTRODUCTION

Poor transitions between care settings are known to heighten risks of hospital readmission and worsening of symptoms.[1] This is particularly true for inpatient-to-outpatient transitions. Being connected to outpatient care within seven days of discharge is a widely accepted indicator of transition quality, but this actually occurs for less than half of discharged patients within the U.S.[2] Furthermore, even as care transition interventions are being increasingly tested for general medical populations, few specifically target mental health populations.[3]

Mental health conditions affect 46.6% of the U.S. population during their lives and 26.6% of them in any given year.[4] Care transition for patients being discharged from inpatient mental health care to outpatient settings is a growing focus for health care delivery systems. This has been especially true as more of them align their practices to the evidence-based Collaborative Care Model (CCM).[5-7] The CCM is grounded in delivering anticipatory, coordinated, and patient-centered care,[5, 8, 9] and in turn calls for communicative and collaborative transition processes that make such care possible.

Studies of these inpatient-to-outpatient transition processes, both observational[10, 11] and interventional,[12, 13] are thus on the rise, and many of them use the rate of post-discharge readmissions as a patient-level outcome measure to assess the quality of transition.[14, 15] It is currently unclear, however, how exactly studies define the measure, and whether there is a shared understanding by the field regarding which definition is appropriate for which circumstances. Namely, readmissions rate associated with a care setting is its proportion of patients who are re-hospitalized within a certain time period since their previous hospitalization. Defining this requires, at minimum, (i) specification of the time period (i.e., readmission time interval), (ii) classification of “re”-hospitalization (i.e., related to the previous hospitalization and therefore possibly unnecessary or preventable, as opposed to an unrelated hospitalization due to a new care need), and (iii) cases that should be included/excluded from consideration.

3M Health Information Systems’ Potentially Preventable Readmissions Classification System [16] offers a proprietary methodology for measuring readmissions that is widely used by health care systems,[17] insurance companies,[18] and state-wide organizations.[19] Its publicly available information describes the methodology’s ability to consider mental health or substance abuse problems as critical factors to adjust for in measurement.[20] It is difficult to glean from the information, however, what constitutes a meaningful readmission time interval and any mental health-specific considerations that need to be made when measuring psychiatric readmissions.

In order to advance the field regarding transitional interventions to prevent psychiatric readmissions, we first need to establish approaches to measuring psychiatric readmissions that, if not uniform, can at least be made explicit as to how they relate to or differ from one another. Thus, as a first step towards the eventual goal of being able to rigorously evaluate transitional interventions’ effect on psychiatric readmissions rates, we will conduct a scoping review of peer-reviewed literature to delineate the current landscape of how published studies have approached measuring psychiatric readmissions. We outline below our review protocol, and also discuss our work’s timeliness in terms of ethical considerations and plans for dissemination to those most in need of knowledge to be generated through this work.

## OBJECTIVE

The objective of this scoping review is to systematically examine what is known in the literature about measuring unnecessary psychiatric readmissions. Closely aligning to the purpose of conducting scoping reviews, we will aim to map current knowledge, identify existing gaps, and set the research agenda with regards to measuring unnecessary psychiatric readmissions.

## METHODS AND ANALYSIS

We will structure the steps of the scoping review according to Levac et al.'s enhancement[21] to Arksey and O'Malley's six-stage methodological framework for conducting scoping studies.[22] The framework's six stages include (i) defining the research question, (ii) identifying relevant literature, (iii) study selection, (iv) data extraction, (v) collating, summarizing, and reporting the results, and (vi) consultation process and engagement of knowledge users. We will align to the Preferred Reporting Items for Systematic Reviews and Meta-Analyses (PRISMA) extensions for Protocols (PRISMA-P);[23] Supplementary File 1) and Scoping Reviews (PRISMA-ScR)[24] for conducting and reporting on the specific review steps. Modeling after Marchand and colleagues' 2018 protocol for a scoping review of patient-centered care for addiction treatment,[25] we will take an iterative and reflexive approach throughout the review process, especially to refine our study selection and data extraction steps (Stages 3 and 4 below) to best target meeting our objective. Our protocol is registered through the Open Science Framework (<https://osf.io/5nxuc/>),[26] and all tracking for literature identification, study selection, data extraction, and results synthesis will be carried out using Microsoft Excel spreadsheet software[27].

### Stage 1: Defining the research question

We developed our research question by following the recommendations of Levac et al.'s enhanced framework[21] to start broadly then hone the question while keeping in mind the scoping review's main purpose. We started with, "What is known about measuring unnecessary psychiatric readmissions?" We found our notion of "unnecessary readmission" to be accurately described by Goldfield et al.[28]'s definition of "potentially preventable readmission" – a subsequent admission that occurs within the readmission time interval and is clinically related to a prior admission, where (i) readmission is a return hospitalization to an acute care hospital that follows a prior acute care admission within a specified time interval (i.e., readmission time interval), (ii) readmission time interval is the maximum number of days allowed between the discharge date of a prior admission and the admitting date of a subsequent admission, and (iii) a readmission's clinical relationship to a prior admission is established using diagnostic classifications, often the principal diagnosis associated with each admission.

An initial exploratory search of article databases including National Center for Biotechnology Information (NCBI – PubMed) revealed several systematic reviews of discharge planning and transitional interventions associated with psychiatric readmissions.[29-31] Although findings from these reviews

1  
2  
3 were focused on examining the interventions' content and their related multi (e.g., individual to  
4 system)-level characteristics, these works helpfully noted that they came across substantial variabilities  
5 in how their reviewed studies (i) designated the readmission time interval to be considered,[29, 30] (ii)  
6 set the inclusion/exclusion criteria for unnecessary readmissions,[31] and (iii) approached case-mix  
7 adjustment in their measurement of readmission rates to account for factors related to a patient's  
8 clinical status that are associated with readmission risk.[31]  
9

10  
11 Hence, this scoping review aims to answer the following questions:

- 12 1. What durations are used as the psychiatric readmission time interval?
- 13 2. What criteria are applied to designating a psychiatric readmission as unnecessary?
- 14 3. What risks are adjusted for in calculating psychiatric readmission rates?

15 We plan to additionally examine any reasons put forth by our reviewed studies on their choices of these  
16 durations, criteria, and risks.  
17

## 18 19 20 **Stage 2: Identifying relevant literature**

21  
22 In order to systematically examine what is known about measuring unnecessary psychiatric  
23 readmissions, we will conduct a comprehensive review of the existing literature and evidence base. To  
24 ensure methodological rigor, our search strategy (Supplementary File 2) will include a range of  
25 bibliographic databases and related article searching. 'Readmission' is often used interchangeably with  
26 related terms such as unnecessary hospitalization, inappropriate hospitalization, unplanned admission,  
27 or unscheduled admission.[32] Our research objective therefore poses a challenge to keyword  
28 formulation. The search strategy will address this issue by being iteratively developed by the research  
29 team in collaboration with experienced medical and social services librarians as well as consulting  
30 experts within the field. This peer review of the search strategy will also provide a subjective  
31 validation.[33] Search terms will be harvested using benchmark article terms and subject headings, titles  
32 and abstracts of key articles, dictionaries, and synonyms and subject headings within Embase and  
33 Pubmed's MeSH database.  
34  
35

36  
37 The electronic databases in which the comprehensive search will be conducted include Medline (Ovid),  
38 Embase (Ovid), PsycINFO, CINAHL, Cochrane, and ISI Web of Science. These sources include relevant  
39 journals within the fields of medicine, health services, and the social sciences and were selected to  
40 capture a comprehensive sample of literature. Boolean logic and proximity operators will be used to  
41 combine and refine search terms. The first 100 search results from each database will be reviewed by  
42 the research team to ensure validity of the search strategy.  
43  
44

## 45 46 **Stage 3: Study selection**

47  
48 Selection of studies to include in our scoping review will proceed in two phases. In the initial  
49 title/abstract screening phase, we will designate a study or a literature review of studies to be eligible  
50 for the subsequent full-text screening phase if it (i) concerns the mental health population, (ii) measures  
51 psychiatric readmission rates, (iii) is set in a health care context, and (iv) is a peer-reviewed journal  
52 article published in English through February 2019 (we will exclude editorial and other articles that  
53 report on individual viewpoints). Then, in the full-text screening phase, we will designate a study or a  
54 literature review of studies to be included in the scoping review if it (v) is regarding an intervention (for  
55 either research investigation or quality improvement) associated with psychiatric readmission and (vi)  
56  
57  
58

specifies at least one readmission time interval used.

We have developed these criteria for study selection a priori, collaboratively as a research team and in close discussions with our consultants (please see the section below on Stage 6: Consultation process and engagement of knowledge users). For each phase, the criteria will first be applied to the larger of ten articles or 10% of articles to be screened, then refined to be applied to the remaining articles. Two independent screeners (CW and BK) will be responsible for first independently screening, then comparing with one another their individual decisions on, whether each article meets the criteria. For articles for which the individual decisions differ, a third screener (CBW) will be involved in discussions toward reaching group consensus.

#### Stage 4: Data extraction

Identified literature and their selection status through the title/abstract and full-text screening phases will be tracked using Microsoft Excel[27] spreadsheet files. Data extraction from resulting articles to be included in the scoping review will use an Excel-based template designed to collect the article identification number and relevant information from each article. The domains for which data will be extracted are listed and defined in Table 1. The data extraction template, particularly its domains and definitions, will be piloted on the larger of ten or 10% of articles to be reviewed, then refined for data extraction from the remaining articles. CW will serve as the primary data extractor for half of the articles, and BK will serve as the secondary extractor, reviewing the same articles to verify and augment the extraction. The other half of the articles will have BK as the primary data extractor and CW as the secondary extractor. Articles for which the primary and secondary data extractors do not agree on the extracted content will involve a third reviewer (CBW) to discuss towards reaching consensus.

Table 1: Definitions of domains for which data will be extracted.

| Domain                          | Definition                                                                                                                                                                      |
|---------------------------------|---------------------------------------------------------------------------------------------------------------------------------------------------------------------------------|
| Author(s)                       | Author(s) of the article                                                                                                                                                        |
| Year                            | Article's year of publication                                                                                                                                                   |
| Country                         | Article's country of publication                                                                                                                                                |
| Objective                       | Aim of the study                                                                                                                                                                |
| Design                          | Approach taken by the study to reach its aim – e.g., experimental/observational, quantitative/qualitative/mixed-methods, review                                                 |
| Health care context and setting | Clinical, organizational, and geographical environment in which the study was conducted – e.g., inpatient psychiatric care, integrated health care system, urban/rural practice |



|                                                                        |                                                                                                                                                                                                         |
|------------------------------------------------------------------------|---------------------------------------------------------------------------------------------------------------------------------------------------------------------------------------------------------|
| Target population                                                      | Population to which the study results are meant to be applicable                                                                                                                                        |
| Sample size                                                            | Number of individuals, clinics, and/or organizations (depending on the study's focus) involved in the study                                                                                             |
| Intervention                                                           | The difference across which study outcomes were examined (i.e., independent variable) – e.g., a newly implemented inpatient-to-outpatient discharge planning tool                                       |
| Control                                                                | Individuals, clinics, and/or organizations (depending on the study's focus) used as a baseline against which the intervention's impact was assessed – e.g., parallel, historical, not applicable        |
| Readmission time interval                                              | Duration since the previous discharge from inpatient care, within which an acute care hospitalization was considered to be a readmission                                                                |
| Criteria for designating a readmission as unnecessary                  | Standards applied by the study to designate an admission as a readmission – e.g., occurred within a certain readmission time interval of a prior admission, diagnostically related to a prior admission |
| Criteria for excluding a readmission from being considered unnecessary | Standards applied to exclude a readmission from being a part of the study's readmission rate calculation – e.g., associated with conditions for which subsequent readmissions are expected              |
| Risk adjustments in calculating readmission rates                      | Factors potentially influencing the readmission rate (and are independent of care quality) that the study accounted for – e.g., symptom severity                                                        |
| Other outcomes                                                         | Measurements other than for readmissions that the study also examined across its comparison groups (i.e., dependent variables)                                                                          |
| Key findings                                                           | Main results of the study                                                                                                                                                                               |
| Additional notes                                                       | Other information from the article that may be pertinent to this scoping review                                                                                                                         |

### Stage 5: Collating, summarizing, and reporting the results

The extracted data will be readied for presentation using a tabular representation. Aligning to the specific questions that our scoping review aims to answer (listed under the section above on Stage 1: Defining the research question), we will summarize the findings along the dimensions of (i) readmission time interval, (ii) unnecessary readmission definition, and (iii) case-mix adjustment approach used by our reviewed studies. We will follow PRISMA-ScR[24]'s guidelines for reporting these findings.

In addition to the main dimensions along which the findings will be tabulated and examined, we will conduct a thematic analysis of prevalent trends in study characteristics across our reviewed studies.

1  
2  
3 CW and BK will independently review the extracted data to identify emergent codes representative of  
4 the nature of the study design and key findings. Constant comparison combined with consensus-  
5 building discussions[34] will be used to finalize the list of emergent codes and their definitions. We will  
6 identify overarching themes based on reviewing the data associated with each code, and supplement  
7 delineation of the themes using relevant numerical trends from the data for additional context (e.g.,  
8 proportion of studies conducted within an integrated care system context).  
9

## 10 11 12 **Stage 6: Consultation process and engagement of knowledge users**

13  
14 Keeping in mind the initial motivation for our scoping review to inform future research to implement  
15 evidence-based inpatient-to-outpatient transition models into mental health care systems, we will  
16 closely engage our multidisciplinary research colleagues and partnered health care system  
17 representatives for each of Stages 1 through 5 above. These individuals have clinical and  
18 administrative expertise in mental health care delivery and their system-wide organization, including  
19 front-line practitioners, leadership of local, regional, and national care networks, and health services  
20 researchers with expertise in care transitions and admissions data. They have already played a key role  
21 in helping us understand the current status of readmissions measurement and formulating the  
22 questions that our scoping review will focus on answering. We plan to seek ongoing consultation from  
23 these individuals, to help ensure relevant contextualization of our review efforts.  
24  
25

## 26 27 28 **Patient and public involvement**

29  
30 To ensure that patient perspectives are fully incorporated into every step of our planned scoping review,  
31 our consultants include patient representatives who will actively shape the research team's consensus,  
32 methods refinement, interpretation of findings, and subsequent research planning. These  
33 representatives came to be involved with our work through the first author's research center [Center for  
34 Healthcare Organization and Implementation Research (CHOIR), a Department of Veterans Affairs  
35 Health Services Research & Development Center of Innovation]'s established Veterans Engagement  
36 Research Group (VERG). VERG is a CHOIR-based community that is explicitly chartered to engage  
37 veterans and their family members as active partners in research through communication regarding  
38 opportunities to be involved, co-development of research ideas, and collaboration on tasks. VERG's  
39 quarterly meetings will serve as a key forum through which we will regularly share our progress and  
40 receive additional timely feedback.  
41  
42  
43  
44  
45

## 46 47 48 **ETHICS AND DISSEMINATION**

49  
50 This review, to our knowledge, is the first to focus on comprehensively outlining the landscape of how  
51 psychiatric readmissions are defined for measurement. This work will be conducted at a time of  
52 heightened interest by many health care systems in devising high quality practices that structure their  
53 care processes toward effectively coordinating inpatient-to-outpatient transitions.[35, 36] Particularly  
54 for public sector organizations with substantial commitments to delivering mental health care, findings  
55 from our review will support their careful examination of alternative potential transitional interventions,  
56 helping to ensure that their often limited quality enhancement resources[37] are put to optimal use.  
57  
58  
59

1  
2  
3 We will share findings from this scoping review with the scientific community through peer-reviewed  
4 journal publications and presentations at national conferences. We will additionally focus on  
5 disseminating our findings to the larger health care community through both existing communication  
6 infrastructures (e.g., VERG, described in the section above on Patient and Public Involvement) and newly  
7 formed connections with health system stakeholders that our multidisciplinary consultants (please see  
8 the section above on Stage 6: Consultation process and engagement of knowledge users) will help foster.  
9 Importantly, this close communication with stakeholders will help shape our subsequent research  
10 agenda to ensure that it is appropriate and feasible, maximizing the potential for real-world health  
11 system impact.  
12  
13

14  
15  
16 **Acknowledgements:** We would like to thank Ms. Michelle Doering and Ms. Susan Fowler at the  
17 libraries of the Washington University in St. Louis for their valuable support in drafting and refining this  
18 scoping review's search strategy. We would also like to thank Dr. A. Rani Elwy at the Alpert Medical  
19 School of Brown University and the Edith Nourse Rogers Memorial Veterans Hospital for connecting our  
20 team to health services researchers with expertise in readmissions measurement.  
21

22  
23 **Author contributions:** BK and CW developed the scoping review protocol, with close guidance from  
24 EKP on the review's conceptualization. CW led the development of the search strategy and refined the  
25 data extraction domains together with BK and CBW. BK led the preparation of the manuscript draft,  
26 and CW, CBW, and EKP provided critical revisions to the manuscript's intellectual content. All authors  
27 read and approved the final manuscript.  
28

29  
30 **Funding:** The preparation of this manuscript was supported in part by the Implementation Research  
31 Institute (IRI), at the George Warren Brown School of Social Work, Washington University in St. Louis;  
32 through an award from the National Institute of Mental Health (5R25MH08091607), National Institute  
33 on Drug Abuse, and VA HSR&D QUERI.  
34

35 **Competing interests:** The authors declare that they have no competing interests.  
36

37 **Data availability statement:** There are no data in this work.  
38  
39  
40

## 41 REFERENCES

42  
43 1 Nelson EA, Maruish ME, Axler JL. Effects of discharge planning and compliance with outpatient  
44 appointments on readmission rates. *Psychiatr Serv* 2000;51:885-9. doi: 10.1176/appi.ps.51.7.885  
45 [published Online First: 2000/07/01].  
46

47  
48 2 National Committee for Quality Assurance: The State of Healthcare Quality 2011. Washington, DC:  
49 National Committee for Quality Assurance, 2011.  
50

51  
52 3 Viggiano T, Pincus HA, Crystal S. Care transition interventions in mental health. *Curr Opin Psychiatry*  
53 2012;25:551-8. doi: 10.1097/YCO.0b013e328358df75 [published Online First: 2012/09/21].  
54

55  
56 4 Kessler RC, Wang PS. The descriptive epidemiology of commonly occurring mental disorders in the  
57 United States. *Annu Rev Public Health* 2008;29:115-29. doi:  
58  
59

1  
2  
3 10.1146/annurev.publhealth.29.020907.090847 [published Online First: 2008/03/20].  
4

5 Coleman K, Austin BT, Brach C, et al. Evidence on the Chronic Care Model in the new millennium.  
6 *Health Aff (Millwood)* 2009;28:75-85. doi: 10.1377/hlthaff.28.1.75 [published Online First: 2009/01/07].  
7

8  
9 6 Goodrich DE, Kilbourne AM, Nord KM, et al. Mental health collaborative care and its role in primary  
10 care settings. *Curr Psychiatry Rep* 2013;15:383. doi: 10.1007/s11920-013-0383-2 [published Online First:  
11 2013/08/15].  
12

13 7 Bauer MS, Miller C, Kim B, et al. Partnering with health system operations leadership to develop a  
14 controlled implementation trial. *Implement Sci* 2016;11:22. doi: 10.1186/s13012-016-0385-7 [published  
15 Online First: 2016/02/24].  
16

17  
18 8 Woltmann E, Grogan-Kaylor A, Perron B, et al. Comparative effectiveness of collaborative chronic care  
19 models for mental health conditions across primary, specialty, and behavioral health care settings:  
20 systematic review and meta-analysis. *Am J Psychiatry* 2012;169:790-804. doi:  
21 10.1176/appi.ajp.2012.11111616 [published Online First: 2012/07/01].  
22

23 9 Miller CJ, Grogan-Kaylor A, Perron BE, et al. Collaborative chronic care models for mental health  
24 conditions: cumulative meta-analysis and metaregression to guide future research and implementation.  
25 *Med Care* 2013;51:922-30. doi: 10.1097/MLR.0b013e3182a3e4c4 [published Online First: 2013/10/01].  
26

27  
28 10 Guzman-Parra J, Moreno-Küstner B, Rivas F, et al. Needs, Perceived Support, and Hospital  
29 Readmissions in Patients with Severe Mental Illness. *Community Ment Health J* 2018;54:189-96. doi:  
30 10.1007/s10597-017-0095-x [published Online First: 2017/02/07].  
31

32  
33 11. Kurdyak P, Vigod SN, Newman A, et al. Impact of Physician Follow-Up Care on Psychiatric  
34 Readmission Rates in a Population-Based Sample of Patients With Schizophrenia. *Psychiatr Serv*  
35 2018;69(1):61-68. doi: 10.1176/appi.ps.201600507 [published Online First: 2017/09/01].  
36

37 12 von Wyl A, Heim G, Rüsç N, et al. Network coordination following discharge from psychiatric  
38 inpatient treatment: a study protocol. *BMC psychiatry* 2013;13:1-7. doi: 10.1186/1471-244X-13-220  
39 [published Online First: 2013/09/04].  
40

41 13 Shaffer SL, Hutchison SL, Ayers AM, et al. Brief Critical Time Intervention to Reduce Psychiatric  
42 Rehospitalization *Psychiatr Serv* 2015;66:1155-61. doi: 10.1176/appi.ps.201400362 [published Online  
43 First: 2015/08/03].  
44

45  
46 14 Rosen CS, Tiet QQ, Harris AH, et al. Telephone monitoring and support after discharge from  
47 residential PTSD treatment: a randomized controlled trial. *Psychiatric Services* 2013;64:13-20. doi:  
48 10.1176/appi.ps.201200142 [published Online First: 2013/01/01].  
49

50 15 Hutchison SL, Flanagan JV, Karpov I, et al. Care Management Intervention to Decrease Psychiatric and  
51 Substance Use Disorder Readmissions in Medicaid-Enrolled Adults. *J Behav Health Serv Res* 2018. doi:  
52 10.1007/s11414-018-9614-y [published Online First: 2015/05/11].  
53

54 16 3M Health Information Systems. Potentially Preventable Readmissions Classification System  
55 Methodology: Overview. 3m Health Information Systems; 2012. October, Report No.: GRP-139.  
56  
57  
58

1  
2  
3 <http://multimedia.3m.com/mws/media/10426100/resources-and-references-his-2015.pdf> (accessed 25  
4 Jan 2019).  
5

6  
7 17 McCoy RG, Peterson SM, Borkenhagen LS, et al. Which Readmissions May Be Preventable? Lessons  
8 Learned From a Posthospitalization Care Transitions Program for High-risk Elders. *Med Care*  
9 2018;56:693-700. doi: 10.1097/MLR.0000000000000946 published Online First: 2019/03/25].  
10

11  
12 18 Molina Healthcare. All-Cause Readmission and Potentially Preventable Readmission  
13 (PPR) Payment Policy for Medicare, Medicaid and MyCare Ohio Lines of Business.  
14 [https://www.molinahealthcare.com/providers/oh/medicaid/forms/PDF/oh-provider-readmission-](https://www.molinahealthcare.com/providers/oh/medicaid/forms/PDF/oh-provider-readmission-policy.pdf)  
15 [policy.pdf](https://www.molinahealthcare.com/providers/oh/medicaid/forms/PDF/oh-provider-readmission-policy.pdf) (accessed 22 Feb 2019).  
16

17  
18 19 Minnesota Hospital Association. Overview of APR DRGs and Potentially Preventable Readmissions.  
19 June 2018. [https://www.mnhospitals.org/Portals/0/Documents/data-](https://www.mnhospitals.org/Portals/0/Documents/data-reporting/Performance_Matrix/3M%20PMX%20-%20Webinar%203%20-APR%20DRGs%20and%20PPRs_MN%20Hospitals_06282018.pdf)  
20 [reporting/Performance\\_Matrix/3M%20PMX%20-%20Webinar%203%20-](https://www.mnhospitals.org/Portals/0/Documents/data-reporting/Performance_Matrix/3M%20PMX%20-%20Webinar%203%20-APR%20DRGs%20and%20PPRs_MN%20Hospitals_06282018.pdf)  
21 [APR%20DRGs%20and%20PPRs\\_MN%20Hospitals\\_06282018.pdf](https://www.mnhospitals.org/Portals/0/Documents/data-reporting/Performance_Matrix/3M%20PMX%20-%20Webinar%203%20-APR%20DRGs%20and%20PPRs_MN%20Hospitals_06282018.pdf) (accessed 22 Feb 2019).  
22

23  
24 20 3M Potentially Preventable Readmissions Grouping Software. 3m Health Information Systems; 2015.  
25 <http://multimedia.3m.com/mws/media/8499030/3m-ppr-grouping-software-fact-sheet.pdf> (accessed  
26 25 Jan 2019).  
27

28  
29 21 Levac D, Colquhoun H, O'Brien KK. Scoping studies: advancing the methodology. *Implement Sci*  
30 2010;5:69. doi: 10.1186/1748-5908-5-69 [published Online First: 2010/09/20].  
31

32  
33 22 Arksey H, O'Malley L. Scoping Studies: Towards a Methodological Framework.  
34 *Int J Soc Res Methodol* 2005;8:19-32. doi: 10.1080/1364557032000119616 [published Online First: 23  
35 Feb 2007].  
36

37  
38 23 Moher D, Shamseer L, Clarke M, et al. Preferred reporting items for systematic review and meta-  
39 analysis protocols (PRISMA-P) 2015 statement. *Syst Rev* 2015;4:1-1. doi: 10.1186/2046-4053-4-1  
40 [published Online First 1 January 2015].  
41

42  
43 24 Tricco AC, Lillie E, Zarin W, et al. PRISMA Extension for Scoping Reviews (PRISMA-ScR): Checklist and  
44 Explanation. *Ann Intern Med* 2018;169:467-73. doi: 10.7326/M18-0850 [published Online First: 4 Sep  
45 2018].  
46

47  
48 25 Marchand K, Beaumont S, Westfall J, et al. Patient-centred care for addiction treatment: a scoping  
49 review protocol. *BMJ Open* 2018;8:e024588. doi: 10.1136/bmjopen-2018-024588 [published Online First:  
50 2018/12/27].  
51

52  
53 26 Center for Open Science. *Open science framework*. Charlottesville, VA, 2011.  
54

55  
56 27 Microsoft Excel. <https://products.office.com/en-us/excel> (accessed 25 January 2019).  
57

58  
59 28 Goldfield NI, McCullough EC, Hughes JS, et al. Identifying potentially preventable readmissions.  
60 *Health Care Financ Rev* 2008;30:75-91.

29 Steffen S, Kusters M, Becker T, et al. Discharge planning in mental health care: a systematic review of

1  
2  
3 the recent literature. *Acta Psychiatr Scand* 2009;120:1-9. doi: 10.1111/j.1600-0447.2009.01373.x  
4 [published Online First: 2009/06/03].  
5

6 30 Vigod SN, Kurdyak PA, Dennis CL, et al. Transitional interventions to reduce early psychiatric  
7 readmissions in adults: systematic review. *Br J Psychiatr* 2013;202:187-94. doi:  
8 10.1192/bjp.bp.112.115030 [published Online First: 2018/02/01].  
9

10  
11 31 Donisi V, Tedeschi F, Wahlbeck K, et al. Pre-discharge factors predicting readmissions of psychiatric  
12 patients: a systematic review of the literature. *BMC Psychiatry* 2016;16:449. doi: 10.1186/s12888-016-  
13 1114-0 [published Online First: 2016/12/16].  
14

15 32 Landrum L, Weinrich S. Readmission data for outcomes measurement: identifying and strengthening  
16 the empirical base. *Qual Manag Health Care* 2006;15:83-95.  
17

18  
19 33 McGowan J, Sampson M, Salzwedel DM, et al. PRESS Peer Review of Electronic Search Strategies:  
20 2015 Guideline Statement. *J Clin Epidemiol* 2016;75:40-6. doi: 10.1016/j.jclinepi.2016.01.021 [published  
21 Online First: 2016/03/19].  
22

23 34 Gavrillets S, Auerbach J, van Vugt M. Convergence to consensus in heterogeneous groups and the  
24 emergence of informal leadership. *Sci Rep* 2016;6:29704. doi: 10.1038/srep29704 [published Online  
25 First: 2016/07/14].  
26

27  
28 35 Nurjannah I, Mills J, Usher K, et al. Discharge planning in mental health care: an integrative review of  
29 the literature. *J Clin Nurs* 2014;23:1175-85. doi: 10.1111/jocn.12297 [published Online First:  
30 2013/07/12].  
31

32 36 Gallagher NA. Improving Care Transitions: Complex High-Utilizing Patient Experiences Guide Reform.  
33 *Am J Manag Care* 2017;23:e347-e52.  
34

35  
36 37 Kilbourne AM, Beck K, Spaeth-Rublee B, et al. Measuring and improving the quality of mental health  
37 care: A global perspective. *World Psychiatry* 2018;17:30-38. doi: 10.1002/wps.20482 [published Online  
38 First: 2018/01/19].  
39  
40  
41  
42  
43  
44  
45  
46  
47  
48  
49  
50  
51  
52  
53  
54  
55  
56  
57  
58  
59  
60

## Supplementary File 1

**PRISMA-P (Preferred Reporting Items for Systematic review and Meta-Analysis Protocols) 2015 checklist: recommended items to address in a systematic review protocol\***

| Section and topic                 | Item No | Checklist item                                                                                                                                                                                                                | Reported on Page # |
|-----------------------------------|---------|-------------------------------------------------------------------------------------------------------------------------------------------------------------------------------------------------------------------------------|--------------------|
| <b>ADMINISTRATIVE INFORMATION</b> |         |                                                                                                                                                                                                                               |                    |
| Title:                            |         |                                                                                                                                                                                                                               |                    |
| Identification                    | 1a      | Identify the report as a protocol of a systematic review                                                                                                                                                                      | 1                  |
| Update                            | 1b      | If the protocol is for an update of a previous systematic review, identify as such                                                                                                                                            | N/A                |
| Registration                      | 2       | If registered, provide the name of the registry (such as PROSPERO) and registration number                                                                                                                                    | 2                  |
| Authors:                          |         |                                                                                                                                                                                                                               |                    |
| Contact                           | 3a      | Provide name, institutional affiliation, e-mail address of all protocol authors; provide physical mailing address of corresponding author                                                                                     | 1                  |
| Contributions                     | 3b      | Describe contributions of protocol authors and identify the guarantor of the review                                                                                                                                           | 9                  |
| Amendments                        | 4       | If the protocol represents an amendment of a previously completed or published protocol, identify as such and list changes; otherwise, state plan for documenting important protocol amendments                               | N/A                |
| Support:                          |         |                                                                                                                                                                                                                               |                    |
| Sources                           | 5a      | Indicate sources of financial or other support for the review                                                                                                                                                                 | 9                  |
| Sponsor                           | 5b      | Provide name for the review funder and/or sponsor                                                                                                                                                                             | N/A                |
| Role of sponsor or funder         | 5c      | Describe roles of funder(s), sponsor(s), and/or institution(s), if any, in developing the protocol                                                                                                                            | N/A                |
| <b>INTRODUCTION</b>               |         |                                                                                                                                                                                                                               |                    |
| Rationale                         | 6       | Describe the rationale for the review in the context of what is already known                                                                                                                                                 | 3                  |
| Objectives                        | 7       | Provide an explicit statement of the question(s) the review will address with reference to participants, interventions, comparators, and outcomes (PICO)                                                                      | 4-5                |
| <b>METHODS</b>                    |         |                                                                                                                                                                                                                               |                    |
| Eligibility criteria              | 8       | Specify the study characteristics (such as PICO, study design, setting, time frame) and report characteristics (such as years considered, language, publication status) to be used as criteria for eligibility for the review | 5-6                |
| Information sources               | 9       | Describe all intended information sources (such as electronic databases, contact with study authors, trial registers or other grey literature sources) with planned dates of coverage                                         | 5                  |
| Search strategy                   | 10      | Present draft of search strategy to be used for at least one electronic database, including planned limits, such that it could be repeated                                                                                    | 5                  |
| Study records:                    |         |                                                                                                                                                                                                                               |                    |
| Data management                   | 11a     | Describe the mechanism(s) that will be used to manage records and data throughout the review                                                                                                                                  | 6                  |

|                                    |     |                                                                                                                                                                                                                                                  |                        |
|------------------------------------|-----|--------------------------------------------------------------------------------------------------------------------------------------------------------------------------------------------------------------------------------------------------|------------------------|
| Selection process                  | 11b | State the process that will be used for selecting studies (such as two independent reviewers) through each phase of the review (that is, screening, eligibility and inclusion in meta-analysis)                                                  | 6                      |
| Data collection process            | 11c | Describe planned method of extracting data from reports (such as piloting forms, done independently, in duplicate), any processes for obtaining and confirming data from investigators                                                           | 6                      |
| Data items                         | 12  | List and define all variables for which data will be sought (such as PICO items, funding sources), any pre-planned data assumptions and simplifications                                                                                          | 6-7                    |
| Outcomes and prioritization        | 13  | List and define all outcomes for which data will be sought, including prioritization of main and additional outcomes, with rationale                                                                                                             | 7                      |
| Risk of bias in individual studies | 14  | Describe anticipated methods for assessing risk of bias of individual studies, including whether this will be done at the outcome or study level, or both; state how this information will be used in data synthesis                             | N/A for scoping review |
| Data synthesis                     | 15a | Describe criteria under which study data will be quantitatively synthesised                                                                                                                                                                      | 7-8                    |
|                                    | 15b | If data are appropriate for quantitative synthesis, describe planned summary measures, methods of handling data and methods of combining data from studies, including any planned exploration of consistency (such as $I^2$ , Kendall's $\tau$ ) | 7-8                    |
|                                    | 15c | Describe any proposed additional analyses (such as sensitivity or subgroup analyses, meta-regression)                                                                                                                                            | 7-8                    |
|                                    | 15d | If quantitative synthesis is not appropriate, describe the type of summary planned                                                                                                                                                               | 7-8                    |
| Meta-bias(es)                      | 16  | Specify any planned assessment of meta-bias(es) (such as publication bias across studies, selective reporting within studies)                                                                                                                    | N/A for scoping review |
| Confidence in cumulative evidence  | 17  | Describe how the strength of the body of evidence will be assessed (such as GRADE)                                                                                                                                                               | N/A for scoping review |

**\* It is strongly recommended that this checklist be read in conjunction with the PRISMA-P Explanation and Elaboration (cite when available) for important clarification on the items. Amendments to a review protocol should be tracked and dated. The copyright for PRISMA-P (including checklist) is held by the PRISMA-P Group and is distributed under a Creative Commons Attribution Licence 4.0.**

*From: Shamseer L, Moher D, Clarke M, Ghersi D, Liberati A, Petticrew M, Shekelle P, Stewart L, PRISMA-P Group. Preferred reporting items for systematic review and meta-analysis protocols (PRISMA-P) 2015: elaboration and explanation. BMJ. 2015 Jan 2;349(jan02 1):g7647.*



## Supplementary File 2

## Medline (Ovid) search strategy

| Search term/line number | Conceptual term of interest     | Search term entered into Ovid-Medline                                                                                                                                                                                                                                                                                                                                                                                                                                                                                                       | Number of hits |
|-------------------------|---------------------------------|---------------------------------------------------------------------------------------------------------------------------------------------------------------------------------------------------------------------------------------------------------------------------------------------------------------------------------------------------------------------------------------------------------------------------------------------------------------------------------------------------------------------------------------------|----------------|
| 1                       | Mental disorders                | psychiatric.ti. OR "mental disorder".ti. OR "mental disorders".ti. OR "mental illness".ti. OR "mentally ill".ti.                                                                                                                                                                                                                                                                                                                                                                                                                            | 83986          |
| 2                       | Inpatient psychiatric settings  | Exp "Psychiatric hospitals"/ OR Exp "hospital Psychiatric Department"/ OR "Psychiatric treatment center".mp. OR "Psychiatric Hospital".mp. OR "psychiatric unit".mp. OR "psychiatric units".mp. OR "Mental Institution".mp. OR "Mental Hospital".mp. OR "Psychiatric Department".mp. OR "Psychiatric treatment centers".mp. OR "Psychiatric Hospitals".mp. OR "Mental Institutions".mp. OR "Mental Hospitals".mp. OR "Psychiatric Departments".mp. OR "Psychiatric Ward".mp. OR "psychiatric inpatient".mp. OR "psychiatric inpatients".mp. | 41507          |
| 3                       | Inpatient psychiatric admission | "psychiatric hospitalization".mp. OR "psychiatric hospitalizations".mp. OR "psychiatric readmission".mp. OR "psychiatric readmissions".mp. OR "psychiatric rehospitalization".mp. OR "psychiatric rehospitalizations".mp. OR "psychiatric admission".mp. OR "psychiatric admissions".mp                                                                                                                                                                                                                                                     | 2905           |
| 5                       |                                 | 1 or 2 or 3                                                                                                                                                                                                                                                                                                                                                                                                                                                                                                                                 | 110553         |
| 6                       | Patient Readmission             | Exp "Patient Readmission"/                                                                                                                                                                                                                                                                                                                                                                                                                                                                                                                  | 14332          |
| 7                       | Readmission                     | Readmission*.mp. OR readmitted.ti.                                                                                                                                                                                                                                                                                                                                                                                                                                                                                                          | 28315          |
| 8                       | Rehospitalization               | Rehospitali*.mp.                                                                                                                                                                                                                                                                                                                                                                                                                                                                                                                            | 5515           |
| 9                       | Unnecessary admissions          | "Unnecessary admission".mp. OR "preventable hospitalizations".mp. OR "preventable hospitalization".mp.                                                                                                                                                                                                                                                                                                                                                                                                                                      | 315            |
| 10                      |                                 | 6 or 7 or 8 or 9                                                                                                                                                                                                                                                                                                                                                                                                                                                                                                                            | 31946          |
| 11                      |                                 | 5 and 10                                                                                                                                                                                                                                                                                                                                                                                                                                                                                                                                    | 1747           |

Date of search run: 11 March 2019

# BMJ Open

## Measurement of unnecessary psychiatric readmissions: a scoping review protocol

|                                 |                                                                                                                                                                                                                                                                      |
|---------------------------------|----------------------------------------------------------------------------------------------------------------------------------------------------------------------------------------------------------------------------------------------------------------------|
| Journal:                        | <i>BMJ Open</i>                                                                                                                                                                                                                                                      |
| Manuscript ID                   | bmjopen-2019-030696.R1                                                                                                                                                                                                                                               |
| Article Type:                   | Protocol                                                                                                                                                                                                                                                             |
| Date Submitted by the Author:   | 12-Jun-2019                                                                                                                                                                                                                                                          |
| Complete List of Authors:       | Kim, Bo; U.S. Veterans Health Administration; Harvard Medical School Department of Psychiatry<br>Weatherly, Christopher; Washington University in Saint Louis<br>Wolk, Courtney; University of Pennsylvania,<br>Proctor, Enola; Washington University in Saint Louis |
| <b>Primary Subject Heading</b>: | Mental health                                                                                                                                                                                                                                                        |
| Secondary Subject Heading:      | Health services research                                                                                                                                                                                                                                             |
| Keywords:                       | hospital readmission, administrative data, care transition, patient discharge, MENTAL HEALTH                                                                                                                                                                         |
|                                 |                                                                                                                                                                                                                                                                      |

SCHOLARONE™  
Manuscripts

1  
2  
3 **Measurement of unnecessary psychiatric readmissions: a scoping review protocol**  
4  
5  
6

7 Bo Kim<sup>1,2\*</sup>  
8

9 Christopher Weatherly<sup>3</sup>  
10

11 Courtney Benjamin Wolk<sup>4</sup>  
12

13 Enola K. Proctor<sup>3</sup>  
14  
15

16  
17  
18  
19 <sup>1</sup>Health Services Research & Development Center for Healthcare Organization and Implementation  
20 Research, U.S. Department of Veterans Affairs, Boston, MA, U.S.A.  
21

22 <sup>2</sup>Department of Psychiatry, Harvard Medical School, Boston, MA, U.S.A.  
23

24 <sup>3</sup>George Warren Brown School of Social Work, Washington University, St. Louis, MO, U.S.A.  
25

26 <sup>4</sup>Center for Mental Health, Department of Psychiatry, Perelman School of Medicine, University of  
27 Pennsylvania, Philadelphia, PA, U.S.A.  
28

29  
30  
31 \*Corresponding author

32 Postal address: 150 South Huntington Avenue, Boston, MA 02130 U.S.A.

33 E-mail: bo.kim@va.gov

34 Telephone number: 1-857-364-4867  
35  
36  
37  
38  
39

40 Word count: 3,398  
41  
42  
43  
44  
45

46 Keywords: hospital readmission, administrative data, care transition, patient discharge, mental health  
47  
48  
49  
50  
51  
52  
53  
54  
55  
56  
57  
58

## ABSTRACT

**Introduction:** Care transition for patients being discharged from inpatient mental health care to outpatient settings is a growing focus for health care delivery systems. Many studies of this inpatient-to-outpatient transition use the rate of post-discharge readmissions as a patient-level outcome measure to assess the quality of transition. However, it is unclear how studies define the measure, and whether there is a shared understanding by the field regarding which definition is appropriate for which circumstances. This scoping review thus aims to examine how published studies have approached measuring unnecessary psychiatric readmissions.

**Methods and analysis:** The scoping review will be structured according to Levac et al.'s enhancement to Arksey and O'Malley's framework for conducting scoping reviews. The protocol is registered through the Open Science Framework (<https://osf.io/5nxuc/>). We will search literature databases for studies that (i) are about care transition processes associated with unnecessary psychiatric readmissions and (ii) specify use of at least one readmission time interval (i.e., time period since previous discharge from inpatient care, within which a hospitalization can be considered a readmission). Screening and review of articles will be carried out by two reviewers, first independently then involving a third reviewer as needed for consensus. We will assess review findings through both tabular and thematic analyses, noting prevalent trends in study characteristics and emergent themes across our reviewed studies.

**Ethics and dissemination:** This work comes at a time of heightened interest by many mental health care systems in high quality practices that structure their care processes toward effective inpatient-to-outpatient transitions. Findings will support the systems' careful examination of alternative potential transitional interventions, helping to ensure that their often limited quality enhancement resources are put to optimal use. We will focus on disseminating our findings to the health care community through strong communication infrastructures and connections with health system stakeholders that our multidisciplinary study consultants will foster throughout this study.

## ARTICLE SUMMARY

### Strengths and limitations of this study

- This review plans a comprehensive search of how unnecessary psychiatric readmissions are measured, closely following Levac and colleagues' established methodological framework for conducting scoping reviews.
- This review does not aim to assess the effectiveness of approaches used by the included studies in measuring unnecessary psychiatric readmissions. This aligns with the purpose of conducting scoping reviews, which are for identifying current gaps in knowledge and for establishing a new research agenda.
- Other ways of measuring unnecessary psychiatric readmissions may exist that have not been published as peer-reviewed journal articles that are indexed by the databases included in our review.
- This scoping review will form an essential knowledge base upon which to build future designs,

1  
2  
3 implementations, and evaluations of interventions that enable safe and appropriate care transitions  
4 from inpatient to outpatient mental health care settings.  
5  
6  
7

## 8 9 **INTRODUCTION**

10  
11 Poor transitions between care settings are known to heighten risks of hospital readmission and  
12 worsening of symptoms.[1] This is particularly true for inpatient-to-outpatient transitions. Being  
13 connected to outpatient care within seven days of discharge is a widely accepted indicator of transition  
14 quality, but this actually occurs for less than half of discharged patients within the U.S.[2]  
15 Furthermore, even as care transition interventions are being increasingly tested for general medical  
16 populations, few specifically target mental health populations.[3]  
17

18  
19 Mental health conditions affect 46.6% of the U.S. population during their lives and 26.6% of them in any  
20 given year.[4] Care transition for patients being discharged from inpatient mental health care to  
21 outpatient settings is a growing focus for health care delivery systems. This has been especially true as  
22 more of them align their practices to the evidence-based Collaborative Care Model (CCM).[5-7] The  
23 CCM is grounded in delivering anticipatory, coordinated, and patient-centered care,[5, 8, 9] and in turn  
24 calls for communicative and collaborative transition processes that make such care possible.  
25

26  
27 Studies of these inpatient-to-outpatient transition processes, both observational[10, 11] and  
28 interventional,[12, 13] are thus on the rise, and many of them use the rate of post-discharge  
29 readmissions as a patient-level outcome measure to assess the quality of transition.[14, 15] It is  
30 currently unclear, however, how exactly studies define the measure, and whether there is a shared  
31 understanding by the field regarding which definition is appropriate for which circumstances. Namely,  
32 readmissions rate associated with a care setting is its proportion of patients who are re-hospitalized  
33 within a certain time period since their previous hospitalization. Defining this requires, at minimum, (i)  
34 specification of the time period (i.e., readmission time interval), (ii) classification of “re”-hospitalization  
35 (i.e., related to the previous hospitalization and therefore possibly unnecessary or preventable, as  
36 opposed to an unrelated hospitalization due to a new care need), and (iii) cases that should be  
37 included/excluded from consideration.  
38  
39

40  
41 We found our notion of “unnecessary readmission” to be accurately described by Goldfield et al.[16]’s  
42 definition of “potentially preventable readmission” – a subsequent admission that occurs within the  
43 readmission time interval and is clinically related to a prior admission, where (i) readmission is a return  
44 hospitalization to an acute care hospital that follows a prior acute care admission within a specified time  
45 interval (i.e., readmission time interval), (ii) readmission time interval is the maximum number of days  
46 allowed between the discharge date of a prior admission and the admitting date of a subsequent  
47 admission, and (iii) a readmission’s clinical relationship to a prior admission is established using  
48 diagnostic classifications, often the principal diagnosis associated with each admission.  
49

50  
51 3M Health Information Systems’ Potentially Preventable Readmissions Classification System [17] offers a  
52 proprietary methodology for measuring readmissions that is widely used by health care systems,[18]  
53 insurance companies,[19] and state-wide organizations.[20] Its publicly available information  
54 describes the methodology’s ability to consider mental health or substance abuse problems as critical  
55 factors to adjust for in measurement.[21] It is difficult to glean from the information, however, what  
56 constitutes a meaningful readmission time interval and any mental health-specific considerations that  
57  
58  
59

1  
2  
3 need to be made when measuring unnecessary psychiatric readmissions.  
4

5  
6 In order to advance the field regarding transitional interventions to prevent unnecessary psychiatric  
7 readmissions, we first need to establish approaches to measuring unnecessary psychiatric readmissions  
8 that, if not uniform, can at least be made explicit as to how they relate to or differ from one another.  
9 Thus, as a first step towards the eventual goal of being able to rigorously evaluate transitional  
10 interventions' effect on unnecessary psychiatric readmissions rates, we will conduct a scoping review of  
11 peer-reviewed literature to delineate the current landscape of how published studies have approached  
12 measuring unnecessary psychiatric readmissions. Considering that unnecessary psychiatric  
13 readmissions may be measured differently for different populations, we will focus on the adult  
14 population and include as a part of our review the diagnoses, comorbidities, and voluntariness of  
15 readmissions that are examined by the studies. We outline below our review protocol, and also  
16 discuss our work's timeliness in terms of ethical considerations and plans for dissemination to those  
17 most in need of knowledge to be generated through this work.  
18  
19  
20  
21

## 22 **OBJECTIVE**

23  
24 The objective of this scoping review is to systematically examine what is known in the literature about  
25 measuring unnecessary psychiatric readmissions. Closely aligning to the purpose of conducting  
26 scoping reviews, we will aim to map current knowledge, identify existing gaps, and set the research  
27 agenda with regards to measuring unnecessary psychiatric readmissions.  
28  
29  
30  
31

## 32 **METHODS AND ANALYSIS**

33  
34  
35 We will structure the steps of the scoping review according to Levac et al.'s enhancement[22] to Arksey  
36 and O'Malley's six-stage methodological framework for conducting scoping reviews.[23] The  
37 framework's six stages include (i) defining the research question, (ii) identifying relevant literature, (iii)  
38 study selection, (iv) data extraction, (v) collating, summarizing, and reporting the results, and (vi)  
39 consultation process and engagement of knowledge users. We will align to the Preferred Reporting  
40 Items for Systematic Reviews and Meta-Analyses (PRISMA) extensions for Protocols (PRISMA-P)[24]  
41 (Supplementary File 1) and Scoping Reviews (PRISMA-ScR)[25] for conducting and reporting on the  
42 specific review steps. Modeling after Marchand and colleagues' 2018 protocol for a scoping review of  
43 patient-centered care for addiction treatment,[26] we will take an iterative and reflexive approach  
44 throughout the review process, especially to refine our study selection and data extraction steps (Stages  
45 3 and 4 below) to best target meeting our objective. Our protocol is registered through the Open  
46 Science Framework (<https://osf.io/5nxuc/>),[27] and we will use EndNote[28] in combination with  
47 Microsoft Excel spreadsheet software[29] for tracking and conducting literature identification, study  
48 selection, data extraction, and results synthesis.  
49  
50  
51  
52  
53

### 54 **Stage 1: Defining the research question**

55  
56 We developed our research question by following the recommendations of Levac et al.'s enhanced  
57  
58  
59  
60

framework[22] to start broadly then hone the question while keeping in mind the scoping review's main purpose. We started with, "What is known about measuring unnecessary psychiatric readmissions?" An initial exploratory search of article databases including National Center for Biotechnology Information (NCBI – PubMed) revealed several systematic reviews of discharge planning and transitional interventions associated with psychiatric readmissions.[30-32] Although findings from these reviews were focused on examining the interventions' content and their related multi (e.g., individual to system)-level characteristics, these works helpfully noted that they came across substantial variabilities in how their reviewed studies (i) designated the readmission time interval to be considered,[30, 31] (ii) set the inclusion/exclusion criteria for unnecessary readmissions,[32] and (iii) approached case-mix adjustment in their measurement of readmission rates to account for factors related to a patient's clinical status that are associated with readmission risk.[32]

Hence, this scoping review aims to answer the following questions:

1. What durations are used as the unnecessary psychiatric readmission time interval?
2. What criteria are applied to designating a psychiatric readmission as unnecessary?
3. What risks are adjusted for in calculating unnecessary psychiatric readmission rates?

We plan to additionally examine any reasons put forth by our reviewed studies on their choices of these durations, criteria, and risks.

## Stage 2: Identifying relevant literature

In order to systematically examine what is known about measuring unnecessary psychiatric readmissions, we will conduct a comprehensive review of the existing literature and evidence base. To ensure methodological rigor, our search strategy (Supplementary File 2) will include a range of bibliographic databases and related article searching. 'Readmission' is often used interchangeably with related terms such as unnecessary hospitalization, inappropriate hospitalization, unplanned admission, or unscheduled admission.[33] Our research objective therefore poses a challenge to keyword formulation. The search strategy will address this issue by being iteratively developed by the research team in collaboration with experienced medical and social services librarians as well as consulting experts within the field. This peer review of the search strategy will also provide a subjective validation.[34] Search terms will be harvested using benchmark article terms and subject headings, titles and abstracts of key articles, dictionaries, and synonyms and subject headings within Embase and Pubmed's MeSH database.

The electronic databases in which the comprehensive search will be conducted include Medline (Ovid), Embase (Ovid), PsycINFO, CINAHL, Cochrane, and ISI Web of Science. [Supplementary File 2 demonstrates our search using Medline (Ovid) that resulted in 1,747 identified articles.] These sources include relevant journals within the fields of medicine, health services, and the social sciences and were selected to capture a comprehensive sample of literature. Boolean logic and proximity operators will be used to combine and refine search terms. Duplicate articles will be removed. The first 100 search results from each database will be reviewed by the research team to ensure validity of the search strategy.

## Stage 3: Study selection

Selection of studies to include in our scoping review will proceed in two phases. In the initial title/abstract screening phase, we will designate a study or a literature review of studies to be eligible

for the subsequent full-text screening phase if it (i) concerns the mental health population, (ii) measures psychiatric readmission rates, (iii) is set in a health care context, and (iv) is a peer-reviewed journal article published in English from January 2009 through February 2019 (we will exclude editorial and other articles that report on individual viewpoints). Then, in the full-text screening phase, we will designate a study or a literature review of studies to be included in the scoping review if it (v) is conducted in (and explicitly mentions) the context of some care transition process that is either already being carried out (for non-intervention studies) or is being tested as an intervention (for intervention studies) and (vi) specifies at least one readmission time interval used.

We have developed these criteria for study selection a priori, collaboratively as a research team and in close discussions with our consultants (please see the section below on Stage 6: Consultation Process and Engagement of Knowledge Users). For each phase, the criteria will first be applied to the larger of ten articles or 10% of articles to be screened, then refined to be applied to the remaining articles. Two independent screeners (CW and BK) will be responsible for first independently screening, then comparing with one another their individual decisions on, whether each article meets the criteria. We will calculate Cohen's kappa and percent agreement to assess inter-rater reliability/agreement between the screeners. For articles for which the individual decisions differ, a third screener (CBW) will be involved in discussions toward reaching group consensus.

#### Stage 4: Data extraction

Identified literature and their selection status through the title/abstract and full-text screening phases will be tracked using EndNote[28] and Microsoft Excel[29] spreadsheet files. Data extraction from resulting articles to be included in the scoping review will use an Excel-based template designed to collect the article identification number and relevant information from each article. The domains for which data will be extracted are listed and defined in Table 1. Although our focus is on measurements of unnecessary psychiatric readmissions, we are opting to extract data on intervention and controls, if applicable to the study being reviewed, to understand in detail the context under which the study used its approach to measuring unnecessary psychiatric readmissions. The data extraction template, particularly its domains and definitions, will be piloted on the larger of ten or 10% of articles to be reviewed, then refined for data extraction from the remaining articles. CW will serve as the primary data extractor for half of the articles, and BK will serve as the secondary extractor, reviewing the same articles to verify and augment the extraction. The other half of the articles will have BK as the primary data extractor and CW as the secondary extractor. Articles for which the primary and secondary data extractors do not agree on the extracted content will involve a third reviewer (CBW) to discuss towards reaching consensus.

Table 1: Definitions of domains for which data will be extracted.

| Domain    | Definition                       |
|-----------|----------------------------------|
| Author(s) | Author(s) of the article         |
| Year      | Article's year of publication    |
| Country   | Article's country of publication |



|                                                                        |                                                                                                                                                                                                         |
|------------------------------------------------------------------------|---------------------------------------------------------------------------------------------------------------------------------------------------------------------------------------------------------|
| Objective                                                              | Aim of the study                                                                                                                                                                                        |
| Design                                                                 | Approach taken by the study to reach its aim – e.g., experimental/observational, quantitative/qualitative/mixed-methods, review                                                                         |
| Health care context and setting                                        | Clinical, organizational, and geographical environment in which the study was conducted – e.g., inpatient psychiatric care, integrated health care system, urban/rural practice                         |
| Study/Target population                                                | Population to which the study results are meant to be applicable                                                                                                                                        |
| Diagnoses and comorbidities                                            | Primary diagnoses defining the target population and comorbidities accounted for in the study                                                                                                           |
| Sample size                                                            | Number of individuals, clinics, and/or organizations (depending on the study's focus) involved in the study                                                                                             |
| Intervention                                                           | The difference across which study outcomes were examined (i.e., independent variable) – e.g., a newly implemented inpatient-to-outpatient discharge planning tool                                       |
| Control                                                                | Individuals, clinics, and/or organizations (depending on the study's focus) used as a baseline against which the intervention's impact was assessed – e.g., parallel, historical, not applicable        |
| Voluntariness of re/admissions                                         | Whether the re/admissions being considered by the study are voluntary and/or involuntary                                                                                                                |
| Readmission time interval                                              | Duration since the previous discharge from inpatient care, within which an acute care hospitalization was considered to be a readmission                                                                |
| Criteria for designating a readmission as unnecessary                  | Standards applied by the study to designate an admission as a readmission – e.g., occurred within a certain readmission time interval of a prior admission, diagnostically related to a prior admission |
| Criteria for excluding a readmission from being considered unnecessary | Standards applied to exclude a readmission from being a part of the study's readmission rate calculation – e.g., associated with conditions for which subsequent readmissions are expected              |
| Risk adjustments in calculating readmission rates                      | Factors potentially influencing the readmission rate (and are independent of care quality) that the study accounted for – e.g., symptom severity                                                        |
| Other outcomes                                                         | Measurements other than for readmissions that the study also examined across its comparison groups (i.e., dependent variables)                                                                          |
| Key findings                                                           | Main results of the study                                                                                                                                                                               |

---

|                  |                                                                                 |
|------------------|---------------------------------------------------------------------------------|
| Additional notes | Other information from the article that may be pertinent to this scoping review |
|------------------|---------------------------------------------------------------------------------|

---

### **Stage 5: Collating, summarizing, and reporting the results**

The extracted data will be readied for presentation using a tabular representation. Aligning to the specific questions that our scoping review aims to answer (listed under the section above on Stage 1: Defining the Research Question), we will summarize the findings along the dimensions of (i) readmission time interval, (ii) unnecessary readmission definition, and (iii) case-mix adjustment approach used by our reviewed studies. We will follow PRISMA-ScR[25]'s guidelines for reporting these findings.

In addition to the main dimensions along which the findings will be tabulated and examined, we will conduct a thematic analysis of prevalent trends in study characteristics across our reviewed studies. CW and BK will independently review the extracted data to identify emergent codes representative of the nature of the study design and key findings. Constant comparison combined with consensus-building discussions[35] will be used to finalize the list of emergent codes and their definitions. We will identify overarching themes based on reviewing the data associated with each code, and supplement delineation of the themes using relevant numerical trends from the data for additional context (e.g., proportion of studies conducted within an integrated care system context).

### **Stage 6: Consultation process and engagement of knowledge users**

Keeping in mind the initial motivation for our scoping review to inform future research to implement evidence-based inpatient-to-outpatient transition models into mental health care systems, we will closely engage our multidisciplinary research colleagues and partnered health care system representatives for each of Stages 1 through 5 above. These individuals have clinical and administrative expertise in mental health care delivery and their system-wide organization, including front-line practitioners, leadership of local, regional, and national care networks, and health services researchers with expertise in care transitions and admissions data. They have already played a key role in helping us understand the current status of readmissions measurement and formulating the questions that our scoping review will focus on answering. We plan to seek ongoing consultation from these individuals, to help ensure relevant contextualization of our review efforts.

### **Patient and public involvement**

To ensure that patient perspectives are fully incorporated into every step of our planned scoping review, our consultants include patient representatives who will actively shape the research team's consensus, methods refinement, interpretation of findings, and subsequent research planning. These representatives came to be involved with our work through the first author's research center [Center for Healthcare Organization and Implementation Research (CHOIR), a Department of Veterans Affairs Health Services Research & Development Center of Innovation]'s established Veterans Engagement Research Group (VERG). VERG is a CHOIR-based community that is explicitly chartered to engage veterans and their family members as active partners in research through communication regarding opportunities to be involved, co-development of research ideas, and collaboration on tasks. VERG's

quarterly meetings will serve as a key forum through which we will regularly share our progress and receive additional timely feedback.

### Anticipated timeline of research activities

Our anticipated timeline for the research activities outlined above is provided in the Gantt chart below.

| Research activity                                             | Research month |   |   |   |   |   |   |   |
|---------------------------------------------------------------|----------------|---|---|---|---|---|---|---|
|                                                               | 1              | 2 | 3 | 4 | 5 | 6 | 7 | 8 |
| Stage 1: Defining the research question (completed)           |                |   |   |   |   |   |   |   |
| Stage 2: Identifying relevant literature                      | X              |   |   |   |   |   |   |   |
| Stage 3: Study selection                                      | X              | X | X |   |   |   |   |   |
| Stage 4: Data extraction                                      |                |   | X | X | X | X |   |   |
| Stage 5: Collating, summarizing, and reporting the results    |                |   |   |   |   | X | X | X |
| Stage 6: Consultation process & engagement of knowledge users | X              | X | X | X | X | X | X | X |
| Patient and public involvement                                | X              | X | X | X | X | X | X | X |

### ANTICIPATED LIMITATIONS AND STRENGTHS OF SCOPING REVIEW FINDINGS

This scoping review plans a comprehensive search of how unnecessary psychiatric readmissions are measured, including both intervention and non-intervention studies that are conducted in the context of care transitions. We will closely follow Levac and colleagues' established methodological framework for conducting scoping reviews, adhering to the PRISMA-ScR[25] for reporting on the specific review steps.

This review does not aim to assess the effectiveness of approaches used by the included studies, and in turn will not assess the methodological quality of the included studies beyond specifically examining how they measure unnecessary psychiatric readmissions. This aligns with the purpose of conducting scoping reviews, which are not intended for synthesizing knowledge on effectiveness and rather intended for identifying current gaps in knowledge and establishing a new research agenda.[36]

There may exist other ways of measuring unnecessary psychiatric readmissions that have not been published as peer-reviewed journal articles that are indexed by the databases included in our review. As we allow findings from this scoping review to form an essential knowledge base upon which to build future designs, implementations, and evaluations of care transition interventions from inpatient to outpatient mental health settings, we will remain strongly engaged with our multidisciplinary research colleagues, partnered health care system representatives, and patient collaborators (mentioned in the sections above on Stage 6: Consultation Process and Engagement of Knowledge Users and Patient and Public Involvement). This will help ensure that we incorporate into our next research steps their experiences with measurement practices and other practical considerations, beyond knowledge generated from our review.

## ETHICS AND DISSEMINATION

This review, to our knowledge, is the first to focus on comprehensively outlining the landscape of how unnecessary psychiatric readmissions are defined for measurement. There is no need to seek informed consent for study approval, given that no human research participants are involved. Specifically, our engagement with patient stakeholders are as research collaborators, rather than their involvement being as research subjects. Thus, informed consent, anonymity, and ethics approval from our institutions are not applicable.

This work will be conducted at a time of heightened interest by many health care systems in devising high quality practices that structure their care processes toward effectively coordinating inpatient-to-outpatient transitions.[37, 38] Particularly for public sector organizations with substantial commitments to delivering mental health care, findings from our review will support their careful examination of alternative potential transitional interventions, helping to ensure that their often limited quality enhancement resources[39] are put to optimal use.

We will share findings from this scoping review with the scientific community through peer-reviewed journal publications and presentations at national conferences. We will additionally focus on disseminating our findings to the larger health care community through both existing communication infrastructures (e.g., VERG, described in the section above on Patient and Public Involvement) and newly formed connections with health system stakeholders that our multidisciplinary consultants (please see the section above on Stage 6: Consultation Process and Engagement of Knowledge Users) will help foster. Importantly, this close communication with stakeholders will help shape our subsequent research agenda to ensure that it is appropriate and feasible, maximizing the potential for real-world health system impact.

**Acknowledgements:** We would like to thank Ms. Michelle Doering and Ms. Susan Fowler at the libraries of the Washington University in St. Louis for their valuable support in drafting and refining this scoping review's search strategy. We would also like to thank Dr. A. Rani Elwy at the Alpert Medical School of Brown University and the Edith Nourse Rogers Memorial Veterans Hospital for connecting our team to health services researchers with expertise in readmissions measurement.

**Author contributions:** BK and CW developed the scoping review protocol, with close guidance from EKP on the review's conceptualization. CW led the development of the search strategy and refined the data extraction domains together with BK and CBW. BK led the preparation of the manuscript draft, and CW, CBW, and EKP provided critical revisions to the manuscript's intellectual content. All authors read and approved the final manuscript.

**Funding:** The preparation of this manuscript was supported in part by the Implementation Research Institute (IRI), at the George Warren Brown School of Social Work, Washington University in St. Louis; through an award from the National Institute of Mental Health (5R25MH08091607), National Institute on Drug Abuse, and VA HSR&D QUERI.

**Competing interests:** The authors declare that they have no competing interests.

**Data availability statement:** There are no data in this work.

**REFERENCES**

- 1 Nelson EA, Maruish ME, Axler JL. Effects of discharge planning and compliance with outpatient appointments on readmission rates. *Psychiatr Serv* 2000;51:885-9. doi: 10.1176/appi.ps.51.7.885 [published Online First: 2000/07/01].
- 2 National Committee for Quality Assurance: The State of Healthcare Quality 2011. Washington, DC: National Committee for Quality Assurance, 2011.
- 3 Viggiano T, Pincus HA, Crystal S. Care transition interventions in mental health. *Curr Opin Psychiatry* 2012;25:551-8. doi: 10.1097/YCO.0b013e328358df75 [published Online First: 2012/09/21].
- 4 Kessler RC, Wang PS. The descriptive epidemiology of commonly occurring mental disorders in the United States. *Annu Rev Public Health* 2008;29:115-29. doi: 10.1146/annurev.publhealth.29.020907.090847 [published Online First: 2008/03/20].
- 5 Coleman K, Austin BT, Brach C, et al. Evidence on the Chronic Care Model in the new millennium. *Health Aff (Millwood)* 2009;28:75-85. doi: 10.1377/hlthaff.28.1.75 [published Online First: 2009/01/07].
- 6 Goodrich DE, Kilbourne AM, Nord KM, et al. Mental health collaborative care and its role in primary care settings. *Curr Psychiatry Rep* 2013;15:383. doi: 10.1007/s11920-013-0383-2 [published Online First: 2013/08/15].
- 7 Bauer MS, Miller C, Kim B, et al. Partnering with health system operations leadership to develop a controlled implementation trial. *Implement Sci* 2016;11:22. doi: 10.1186/s13012-016-0385-7 [published Online First: 2016/02/24].
- 8 Woltmann E, Grogan-Kaylor A, Perron B, et al. Comparative effectiveness of collaborative chronic care models for mental health conditions across primary, specialty, and behavioral health care settings: systematic review and meta-analysis. *Am J Psychiatry* 2012;169:790-804. doi: 10.1176/appi.ajp.2012.11111616 [published Online First: 2012/07/01].
- 9 Miller CJ, Grogan-Kaylor A, Perron BE, et al. Collaborative chronic care models for mental health conditions: cumulative meta-analysis and metaregression to guide future research and implementation. *Med Care* 2013;51:922-30. doi: 10.1097/MLR.0b013e3182a3e4c4 [published Online First: 2013/10/01].
- 10 Guzman-Parra J, Moreno-Küstner B, Rivas F, et al. Needs, Perceived Support, and Hospital Readmissions in Patients with Severe Mental Illness. *Community Ment Health J* 2018;54:189-96. doi: 10.1007/s10597-017-0095-x [published Online First: 2017/02/07].
11. Kurdyak P, Vigod SN, Newman A, et al. Impact of Physician Follow-Up Care on Psychiatric Readmission Rates in a Population-Based Sample of Patients With Schizophrenia. *Psychiatr Serv* 2018;69(1):61-68. doi: 10.1176/appi.ps.201600507 [published Online First: 2017/09/01].
- 12 von Wyl A, Heim G, Rüschi N, et al. Network coordination following discharge from psychiatric inpatient treatment: a study protocol. *BMC psychiatry* 2013;13:1-7. doi: 10.1186/1471-244X-13-220

1  
2  
3 [published Online First: 2013/09/04].  
4

5 13 Shaffer SL, Hutchison SL, Ayers AM, et al. Brief Critical Time Intervention to Reduce Psychiatric  
6 Rehospitalization *Psychiatr Serv* 2015;66:1155-61. doi: 10.1176/appi.ps.201400362 [published Online  
7 First: 2015/08/03].  
8

9  
10 14 Rosen CS, Tiet QQ, Harris AH, et al. Telephone monitoring and support after discharge from  
11 residential PTSD treatment: a randomized controlled trial. *Psychiatric Services* 2013;64:13-20. doi:  
12 10.1176/appi.ps.201200142 [published Online First: 2013/01/01].  
13

14 15 Hutchison SL, Flanagan JV, Karpov I, et al. Care Management Intervention to Decrease Psychiatric and  
15 Substance Use Disorder Readmissions in Medicaid-Enrolled Adults. *J Behav Health Serv Res* 2018. doi:  
16 10.1007/s11414-018-9614-y [published Online First: 2015/05/11].  
17

18 16 Goldfield NI, McCullough EC, Hughes JS, et al. Identifying potentially preventable readmissions.  
19 *Health Care Financ Rev* 2008;30:75-91.  
20

21  
22 17 3M Health Information Systems. Potentially Preventable Readmissions Classification System  
23 Methodology: Overview. 3m Health Information Systems; 2012. October, Report No.: GRP-139.  
24 <http://multimedia.3m.com/mws/media/10426100/resources-and-references-his-2015.pdf> (accessed 25  
25 Jan 2019).  
26

27  
28 18 McCoy RG, Peterson SM, Borkenhagen LS, et al. Which Readmissions May Be Preventable? Lessons  
29 Learned From a Posthospitalization Care Transitions Program for High-risk Elders. *Med Care*  
30 2018;56:693-700. doi: 10.1097/MLR.0000000000000946 published Online First: 2019/03/25].  
31

32 19 Molina Healthcare. All-Cause Readmission and Potentially Preventable Readmission  
33 (PPR) Payment Policy for Medicare, Medicaid and MyCare Ohio Lines of Business.  
34 [https://www.molinahealthcare.com/providers/oh/medicaid/forms/PDF/oh-provider-readmission-](https://www.molinahealthcare.com/providers/oh/medicaid/forms/PDF/oh-provider-readmission-policy.pdf)  
35 [policy.pdf](https://www.molinahealthcare.com/providers/oh/medicaid/forms/PDF/oh-provider-readmission-policy.pdf) (accessed 22 Feb 2019).  
36

37  
38 20 Minnesota Hospital Association. Overview of APR DRGs and Potentially Preventable Readmissions.  
39 June 2018. [https://www.mnhospitals.org/Portals/0/Documents/data-](https://www.mnhospitals.org/Portals/0/Documents/data-reporting/Performance_Matrix/3M%20PMX%20-%20Webinar%203%20-APR%20DRGs%20and%20PPRs_MN%20Hospitals_06282018.pdf)  
40 [reporting/Performance\\_Matrix/3M%20PMX%20-%20Webinar%203%20-](https://www.mnhospitals.org/Portals/0/Documents/data-reporting/Performance_Matrix/3M%20PMX%20-%20Webinar%203%20-APR%20DRGs%20and%20PPRs_MN%20Hospitals_06282018.pdf)  
41 [APR%20DRGs%20and%20PPRs\\_MN%20Hospitals\\_06282018.pdf](https://www.mnhospitals.org/Portals/0/Documents/data-reporting/Performance_Matrix/3M%20PMX%20-%20Webinar%203%20-APR%20DRGs%20and%20PPRs_MN%20Hospitals_06282018.pdf) (accessed 22 Feb 2019).  
42

43 21 3M Potentially Preventable Readmissions Grouping Software. 3m Health Information Systems; 2015.  
44 <http://multimedia.3m.com/mws/media/8499030/3m-ppr-grouping-software-fact-sheet.pdf> (accessed  
45 25 Jan 2019).  
46

47  
48 22 Levac D, Colquhoun H, O'Brien KK. Scoping studies: advancing the methodology. *Implement Sci*  
49 2010;5:69. doi: 10.1186/1748-5908-5-69 [published Online First: 2010/09/20].  
50

51 23 Arksey H, O'Malley L. Scoping Studies: Towards a Methodological Framework.  
52 *Int J Soc Res Methodol* 2005;8:19-32. doi: 10.1080/1364557032000119616 [published Online First: 23  
53 Feb 2007].  
54

55  
56 24 Moher D, Shamseer L, Clarke M, et al. Preferred reporting items for systematic review and meta-  
57  
58

1  
2  
3 analysis protocols (PRISMA-P) 2015 statement. *Syst Rev* 2015;4:1-1. doi: 10.1186/2046-4053-4-1  
4 [published Online First 1 January 2015].  
5

6  
7 25 Tricco AC, Lillie E, Zarin W, et al. PRISMA Extension for Scoping Reviews (PRISMA-ScR): Checklist and  
8 Explanation. *Ann Intern Med* 2018;169:467-73. doi: 10.7326/M18-0850 [published Online First: 4 Sep  
9 2018].  
10

11  
12 26 Marchand K, Beaumont S, Westfall J, et al. Patient-centred care for addiction treatment: a scoping  
13 review protocol. *BMJ Open* 2018;8:e024588. doi: 10.1136/bmjopen-2018-024588 [published Online  
14 First: 2018/12/27].  
15

16  
17 27 Center for Open Science. *Open science framework*. Charlottesville, VA, 2011.  
18

19  
20 28 EndNote by Clarivate Analytics. <https://endnote.com> (accessed 7 June 2019).  
21

22  
23 29 Microsoft Excel. <https://products.office.com/en-us/excel> (accessed 25 January 2019).  
24

25  
26 30 Steffen S, Kusters M, Becker T, et al. Discharge planning in mental health care: a systematic review of  
27 the recent literature. *Acta Psychiatr Scand* 2009;120:1-9. doi: 10.1111/j.1600-0447.2009.01373.x  
28 [published Online First: 2009/06/03].  
29

30  
31 31 Vigod SN, Kurdyak PA, Dennis CL, et al. Transitional interventions to reduce early psychiatric  
32 readmissions in adults: systematic review. *Br J Psychiatr* 2013;202:187-94. doi:  
33 10.1192/bjp.bp.112.115030 [published Online First: 2018/02/01].  
34

35  
36 32 Donisi V, Tedeschi F, Wahlbeck K, et al. Pre-discharge factors predicting readmissions of psychiatric  
37 patients: a systematic review of the literature. *BMC Psychiatry* 2016;16:449. doi: 10.1186/s12888-016-  
38 1114-0 [published Online First: 2016/12/16].  
39

40  
41 33 Landrum L, Weinrich S. Readmission data for outcomes measurement: identifying and strengthening  
42 the empirical base. *Qual Manag Health Care* 2006;15:83-95.  
43

44  
45 34 McGowan J, Sampson M, Salzwedel DM, et al. PRESS Peer Review of Electronic Search Strategies:  
46 2015 Guideline Statement. *J Clin Epidemiol* 2016;75:40-6. doi: 10.1016/j.jclinepi.2016.01.021 [published  
47 Online First: 2016/03/19].  
48

49  
50 35 Gavrillets S, Auerbach J, van Vugt M. Convergence to consensus in heterogeneous groups and the  
51 emergence of informal leadership. *Sci Rep* 2016;6:29704. doi: 10.1038/srep29704 [published Online  
52 First: 2016/07/14].  
53

54  
55 36 Pham MT, Rajic A, Greig JD, et al. A scoping review of scoping reviews: advancing the approach and  
56 enhancing the consistency. *Res Synth Methods* 2014;5:371-85.  
57

58  
59 37 Nurjannah I, Mills J, Usher K, et al. Discharge planning in mental health care: an integrative review of  
60 the literature. *J Clin Nurs* 2014;23:1175-85. doi: 10.1111/jocn.12297 [published Online First:  
2013/07/12].

38 Gallagher NA. Improving Care Transitions: Complex High-Utilizing Patient Experiences Guide Reform.

1  
2  
3 *Am J Manag Care* 2017;23:e347-e52.  
4

5 39 Kilbourne AM, Beck K, Spaeth-Rublee B, et al. Measuring and improving the quality of mental health  
6 care: A global perspective. *World Psychiatry* 2018;17:30-38. doi: 10.1002/wps.20482 [published Online  
7 First: 2018/01/19].  
8  
9  
10  
11  
12  
13  
14  
15  
16  
17  
18  
19  
20  
21  
22  
23  
24  
25  
26  
27  
28  
29  
30  
31  
32  
33  
34  
35  
36  
37  
38  
39  
40  
41  
42  
43  
44  
45  
46  
47  
48  
49  
50  
51  
52  
53  
54  
55  
56  
57  
58  
59  
60

For peer review only



## Supplementary File 1

**PRISMA-P (Preferred Reporting Items for Systematic review and Meta-Analysis Protocols) 2015 checklist: recommended items to address in a systematic review protocol\***

| Section and topic                 | Item No | Checklist item                                                                                                                                                                                                                | Reported on Page # |
|-----------------------------------|---------|-------------------------------------------------------------------------------------------------------------------------------------------------------------------------------------------------------------------------------|--------------------|
| <b>ADMINISTRATIVE INFORMATION</b> |         |                                                                                                                                                                                                                               |                    |
| Title:                            |         |                                                                                                                                                                                                                               |                    |
| Identification                    | 1a      | Identify the report as a protocol of a systematic review                                                                                                                                                                      | 1                  |
| Update                            | 1b      | If the protocol is for an update of a previous systematic review, identify as such                                                                                                                                            | N/A                |
| Registration                      | 2       | If registered, provide the name of the registry (such as PROSPERO) and registration number                                                                                                                                    | 2                  |
| Authors:                          |         |                                                                                                                                                                                                                               |                    |
| Contact                           | 3a      | Provide name, institutional affiliation, e-mail address of all protocol authors; provide physical mailing address of corresponding author                                                                                     | 1                  |
| Contributions                     | 3b      | Describe contributions of protocol authors and identify the guarantor of the review                                                                                                                                           | 10                 |
| Amendments                        | 4       | If the protocol represents an amendment of a previously completed or published protocol, identify as such and list changes; otherwise, state plan for documenting important protocol amendments                               | N/A                |
| Support:                          |         |                                                                                                                                                                                                                               |                    |
| Sources                           | 5a      | Indicate sources of financial or other support for the review                                                                                                                                                                 | 10                 |
| Sponsor                           | 5b      | Provide name for the review funder and/or sponsor                                                                                                                                                                             | N/A                |
| Role of sponsor or funder         | 5c      | Describe roles of funder(s), sponsor(s), and/or institution(s), if any, in developing the protocol                                                                                                                            | N/A                |
| <b>INTRODUCTION</b>               |         |                                                                                                                                                                                                                               |                    |
| Rationale                         | 6       | Describe the rationale for the review in the context of what is already known                                                                                                                                                 | 3-4                |
| Objectives                        | 7       | Provide an explicit statement of the question(s) the review will address with reference to participants, interventions, comparators, and outcomes (PICO)                                                                      | 4-5                |
| <b>METHODS</b>                    |         |                                                                                                                                                                                                                               |                    |
| Eligibility criteria              | 8       | Specify the study characteristics (such as PICO, study design, setting, time frame) and report characteristics (such as years considered, language, publication status) to be used as criteria for eligibility for the review | 5-6                |
| Information sources               | 9       | Describe all intended information sources (such as electronic databases, contact with study authors, trial registers or other grey literature sources) with planned dates of coverage                                         | 5                  |
| Search strategy                   | 10      | Present draft of search strategy to be used for at least one electronic database, including planned limits, such that it could be repeated                                                                                    | 5                  |
| Study records:                    |         |                                                                                                                                                                                                                               |                    |
| Data management                   | 11a     | Describe the mechanism(s) that will be used to manage records and data throughout the review                                                                                                                                  | 6                  |

|                                    |     |                                                                                                                                                                                                                                                  |                        |
|------------------------------------|-----|--------------------------------------------------------------------------------------------------------------------------------------------------------------------------------------------------------------------------------------------------|------------------------|
| Selection process                  | 11b | State the process that will be used for selecting studies (such as two independent reviewers) through each phase of the review (that is, screening, eligibility and inclusion in meta-analysis)                                                  | 6                      |
| Data collection process            | 11c | Describe planned method of extracting data from reports (such as piloting forms, done independently, in duplicate), any processes for obtaining and confirming data from investigators                                                           | 6                      |
| Data items                         | 12  | List and define all variables for which data will be sought (such as PICO items, funding sources), any pre-planned data assumptions and simplifications                                                                                          | 6-7                    |
| Outcomes and prioritization        | 13  | List and define all outcomes for which data will be sought, including prioritization of main and additional outcomes, with rationale                                                                                                             | 8                      |
| Risk of bias in individual studies | 14  | Describe anticipated methods for assessing risk of bias of individual studies, including whether this will be done at the outcome or study level, or both; state how this information will be used in data synthesis                             | N/A for scoping review |
| Data synthesis                     | 15a | Describe criteria under which study data will be quantitatively synthesised                                                                                                                                                                      | 8                      |
|                                    | 15b | If data are appropriate for quantitative synthesis, describe planned summary measures, methods of handling data and methods of combining data from studies, including any planned exploration of consistency (such as $I^2$ , Kendall's $\tau$ ) | 8                      |
|                                    | 15c | Describe any proposed additional analyses (such as sensitivity or subgroup analyses, meta-regression)                                                                                                                                            | 8                      |
|                                    | 15d | If quantitative synthesis is not appropriate, describe the type of summary planned                                                                                                                                                               | 8                      |
| Meta-bias(es)                      | 16  | Specify any planned assessment of meta-bias(es) (such as publication bias across studies, selective reporting within studies)                                                                                                                    | N/A for scoping review |
| Confidence in cumulative evidence  | 17  | Describe how the strength of the body of evidence will be assessed (such as GRADE)                                                                                                                                                               | N/A for scoping review |

**\* It is strongly recommended that this checklist be read in conjunction with the PRISMA-P Explanation and Elaboration (cite when available) for important clarification on the items. Amendments to a review protocol should be tracked and dated. The copyright for PRISMA-P (including checklist) is held by the PRISMA-P Group and is distributed under a Creative Commons Attribution Licence 4.0.**

*From: Shamseer L, Moher D, Clarke M, Ghersi D, Liberati A, Petticrew M, Shekelle P, Stewart L, PRISMA-P Group. Preferred reporting items for systematic review and meta-analysis protocols (PRISMA-P) 2015: elaboration and explanation. BMJ. 2015 Jan 2;349(jan02 1):g7647.*

## Supplementary File 2

## Medline (Ovid) search strategy

| Search term/line number | Conceptual term of interest     | Search term entered into Ovid-Medline                                                                                                                                                                                                                                                                                                                                                                                                                                                                                                       | Number of hits |
|-------------------------|---------------------------------|---------------------------------------------------------------------------------------------------------------------------------------------------------------------------------------------------------------------------------------------------------------------------------------------------------------------------------------------------------------------------------------------------------------------------------------------------------------------------------------------------------------------------------------------|----------------|
| 1                       | Mental disorders                | psychiatric.ti. OR "mental disorder".ti. OR "mental disorders".ti. OR "mental illness".ti. OR "mentally ill".ti.                                                                                                                                                                                                                                                                                                                                                                                                                            | 83986          |
| 2                       | Inpatient psychiatric settings  | Exp "Psychiatric hospitals"/ OR Exp "hospital Psychiatric Department"/ OR "Psychiatric treatment center".mp. OR "Psychiatric Hospital".mp. OR "psychiatric unit".mp. OR "psychiatric units".mp. OR "Mental Institution".mp. OR "Mental Hospital".mp. OR "Psychiatric Department".mp. OR "Psychiatric treatment centers".mp. OR "Psychiatric Hospitals".mp. OR "Mental Institutions".mp. OR "Mental Hospitals".mp. OR "Psychiatric Departments".mp. OR "Psychiatric Ward".mp. OR "psychiatric inpatient".mp. OR "psychiatric inpatients".mp. | 41507          |
| 3                       | Inpatient psychiatric admission | "psychiatric hospitalization".mp. OR "psychiatric hospitalizations".mp. OR "psychiatric readmission".mp. OR "psychiatric readmissions".mp. OR "psychiatric rehospitalization".mp. OR "psychiatric rehospitalizations".mp. OR "psychiatric admission".mp. OR "psychiatric admissions".mp                                                                                                                                                                                                                                                     | 2905           |
| 5                       |                                 | 1 or 2 or 3                                                                                                                                                                                                                                                                                                                                                                                                                                                                                                                                 | 110553         |
| 6                       | Patient Readmission             | Exp "Patient Readmission"/                                                                                                                                                                                                                                                                                                                                                                                                                                                                                                                  | 14332          |
| 7                       | Readmission                     | Readmission*.mp. OR readmitted.ti.                                                                                                                                                                                                                                                                                                                                                                                                                                                                                                          | 28315          |
| 8                       | Rehospitalization               | Rehospitali*.mp.                                                                                                                                                                                                                                                                                                                                                                                                                                                                                                                            | 5515           |
| 9                       | Unnecessary admissions          | "Unnecessary admission".mp. OR "preventable hospitalizations".mp. OR "preventable hospitalization".mp.                                                                                                                                                                                                                                                                                                                                                                                                                                      | 315            |
| 10                      |                                 | 6 or 7 or 8 or 9                                                                                                                                                                                                                                                                                                                                                                                                                                                                                                                            | 31946          |
| 11                      |                                 | 5 and 10                                                                                                                                                                                                                                                                                                                                                                                                                                                                                                                                    | 1747           |

Date of search run: 11 March 2019
