# Supplementary material for: Measurement of unnecessary psychiatric readmissions: a scoping review protocol
Source: PubMed Central journal article supplement — BMJ Open. 2019 Jul 23;9(7):e030696. doi: 10.1136/bmjopen-2019-030696 (PMC6661670; doi:10.1136/bmjopen-2019-030696), 2019-07-23
Supplement: bmjopen-2019-030696supp002.pdf [file bmjopen-2019-030696supp002.pdf]

Supplementary File 2

**Medline (Ovid) search strategy**

| Search term/line number | Conceptual term of interest     | Search term entered into Ovid-Medline                                                                                                                                                                                                                                                                                                                                                                                                                                                                                                       | Number of hits |
|-------------------------|---------------------------------|---------------------------------------------------------------------------------------------------------------------------------------------------------------------------------------------------------------------------------------------------------------------------------------------------------------------------------------------------------------------------------------------------------------------------------------------------------------------------------------------------------------------------------------------|----------------|
| 1                       | Mental disorders                | psychiatric.ti. OR "mental disorder".ti. OR "mental disorders".ti. OR "mental illness".ti. OR "mentally ill".ti.                                                                                                                                                                                                                                                                                                                                                                                                                            | 83986          |
| 2                       | Inpatient psychiatric settings  | Exp "Psychiatric hospitals"/ OR Exp "hospital Psychiatric Department"/ OR "Psychiatric treatment center".mp. OR "Psychiatric Hospital".mp. OR "psychiatric unit".mp. OR "psychiatric units".mp. OR "Mental Institution".mp. OR "Mental Hospital".mp. OR "Psychiatric Department".mp. OR "Psychiatric treatment centers".mp. OR "Psychiatric Hospitals".mp. OR "Mental Institutions".mp. OR "Mental Hospitals".mp. OR "Psychiatric Departments".mp. OR "Psychiatric Ward".mp. OR "psychiatric inpatient".mp. OR "psychiatric inpatients".mp. | 41507          |
| 3                       | Inpatient psychiatric admission | "psychiatric hospitalization".mp. OR "psychiatric hospitalizations".mp. OR "psychiatric readmission".mp. OR "psychiatric readmissions".mp. OR "psychiatric rehospitalization".mp. OR "psychiatric rehospitalizations".mp. OR "psychiatric admission".mp. OR "psychiatric admissions".mp                                                                                                                                                                                                                                                     | 2905           |
| 5                       |                                 | 1 or 2 or 3                                                                                                                                                                                                                                                                                                                                                                                                                                                                                                                                 | 110553         |
| 6                       | Patient Readmission             | Exp "Patient Readmission"/                                                                                                                                                                                                                                                                                                                                                                                                                                                                                                                  | 14332          |
| 7                       | Readmission                     | Readmission*.mp. OR readmitted.ti.                                                                                                                                                                                                                                                                                                                                                                                                                                                                                                          | 28315          |
| 8                       | Rehospitalization               | Rehospitali*.mp.                                                                                                                                                                                                                                                                                                                                                                                                                                                                                                                            | 5515           |
| 9                       | Unnecessary admissions          | "Unnecessary admission".mp. OR "preventable hospitalizations".mp. OR "preventable hospitalization".mp.                                                                                                                                                                                                                                                                                                                                                                                                                                      | 315            |
| 10                      |                                 | 6 or 7 or 8 or 9                                                                                                                                                                                                                                                                                                                                                                                                                                                                                                                            | 31946          |
| 11                      |                                 | 5 and 10                                                                                                                                                                                                                                                                                                                                                                                                                                                                                                                                    | 1747           |

Date of search run: 11 March 2019
